# Supplementary material for: Dual Effect: High NADH Levels Contribute to Efflux-Mediated Antibiotic Resistance but Drive Lethality Mediated by Reactive Oxygen Species
Source: PubMed Central journal article supplement (PMC8764520; doi:10.1128/mbio.02434-21), 2022-01-18
Supplement: mbio.02434-21-sf001.pdf [file mbio.02434-21-sf001.pdf]

1

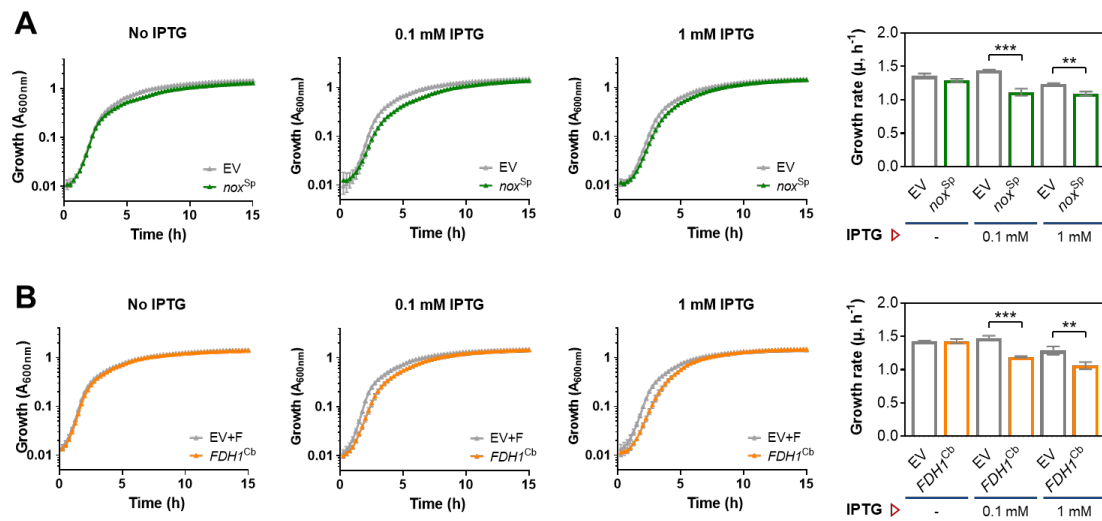

2 **Fig. S1. Growth parameters of *P. aeruginosa* PA14 overexpressing (A) *nox*<sup>Sp</sup> and (B) *FDH1*<sup>Cb</sup>**  
 3 **strains.** Bacteria carrying the *nox*<sup>Sp</sup> oxidase (A) or the *FDH1*<sup>Cb</sup> (B) genes were grown in LB  
 4 medium and the growth (absorbance at  $\lambda = 600$  nm) was recorded in the *Bioscreen C* MBR<sup>TM</sup>  
 5 plate reader each 15 minutes. Cells carrying the empty vector (EV) served as a control and 10  
 6 mM sodium formate were supplemented to the cultures used for the *FDH1*<sup>Cb</sup> strain and the  
 7 respective vector control. Induction of the cultures was achieved by the addition of 0.1 mM or  
 8 1mM IPTG. The specific growth rate ( $\mu$ ) of the cultures (right panels) was calculated from the  
 9 exponential growth by linear regression of log-transformed OD data. Statistical significance  
 10 between  $\mu$  values was calculated by means of a t-test ( $p$ -value: \*\* < 0.01; \*\*\* < 0.001).
