# Supplementary material for: Dual Effect: High NADH Levels Contribute to Efflux-Mediated Antibiotic Resistance but Drive Lethality Mediated by Reactive Oxygen Species
Source: PubMed Central journal article supplement (PMC8764520; doi:10.1128/mbio.02434-21), 2022-01-18
Supplement: mbio.02434-21-sf002.pdf [file mbio.02434-21-sf002.pdf]

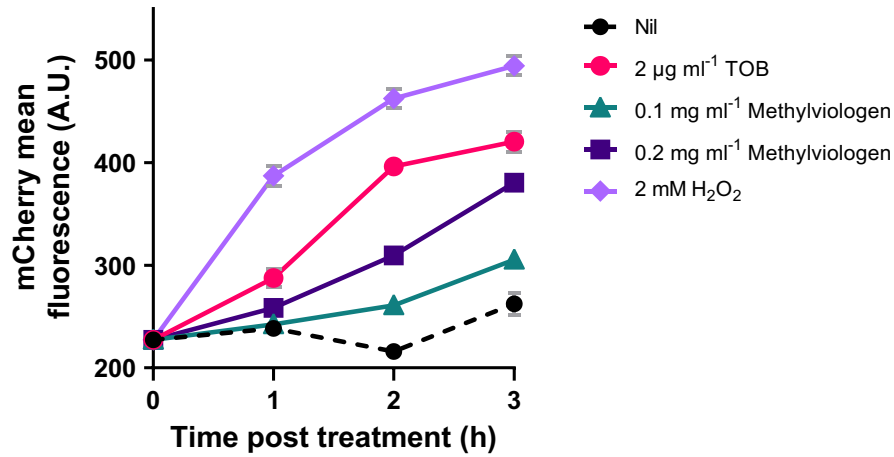

1 **Fig. S2. Evaluation of the pAAHPoxyR2 as an intracellular ROS reporter.** PA14 cells carrying the  
 2 pAAHPoxyR2 vector-borne sensor were cultured in LB medium to early exponential phase of  
 3 growth. At this point, widely known oxidative stress promoting compounds were added to the  
 4 cultures and the specific mCherry signal was recorded each hour by flow cytometry. The plots  
 5 show the mean fluorescence intensities of the samples calculated from the whole cell  
 6 population. The experiment was carried out in triplicates. Statistical differences were assessed  
 7 by means of an unpaired t-test with Welch's correction ( $p$ -value: \*\* < 0.01; \*\*\* < 0.001;  
 8 \*\*\*\* < 0.0001).
