# Supplementary material for: Dual Effect: High NADH Levels Contribute to Efflux-Mediated Antibiotic Resistance but Drive Lethality Mediated by Reactive Oxygen Species
Source: PubMed Central journal article supplement (PMC8764520; doi:10.1128/mbio.02434-21), 2022-01-18
Supplement: mbio.02434-21-sf003.pdf [file mbio.02434-21-sf003.pdf]

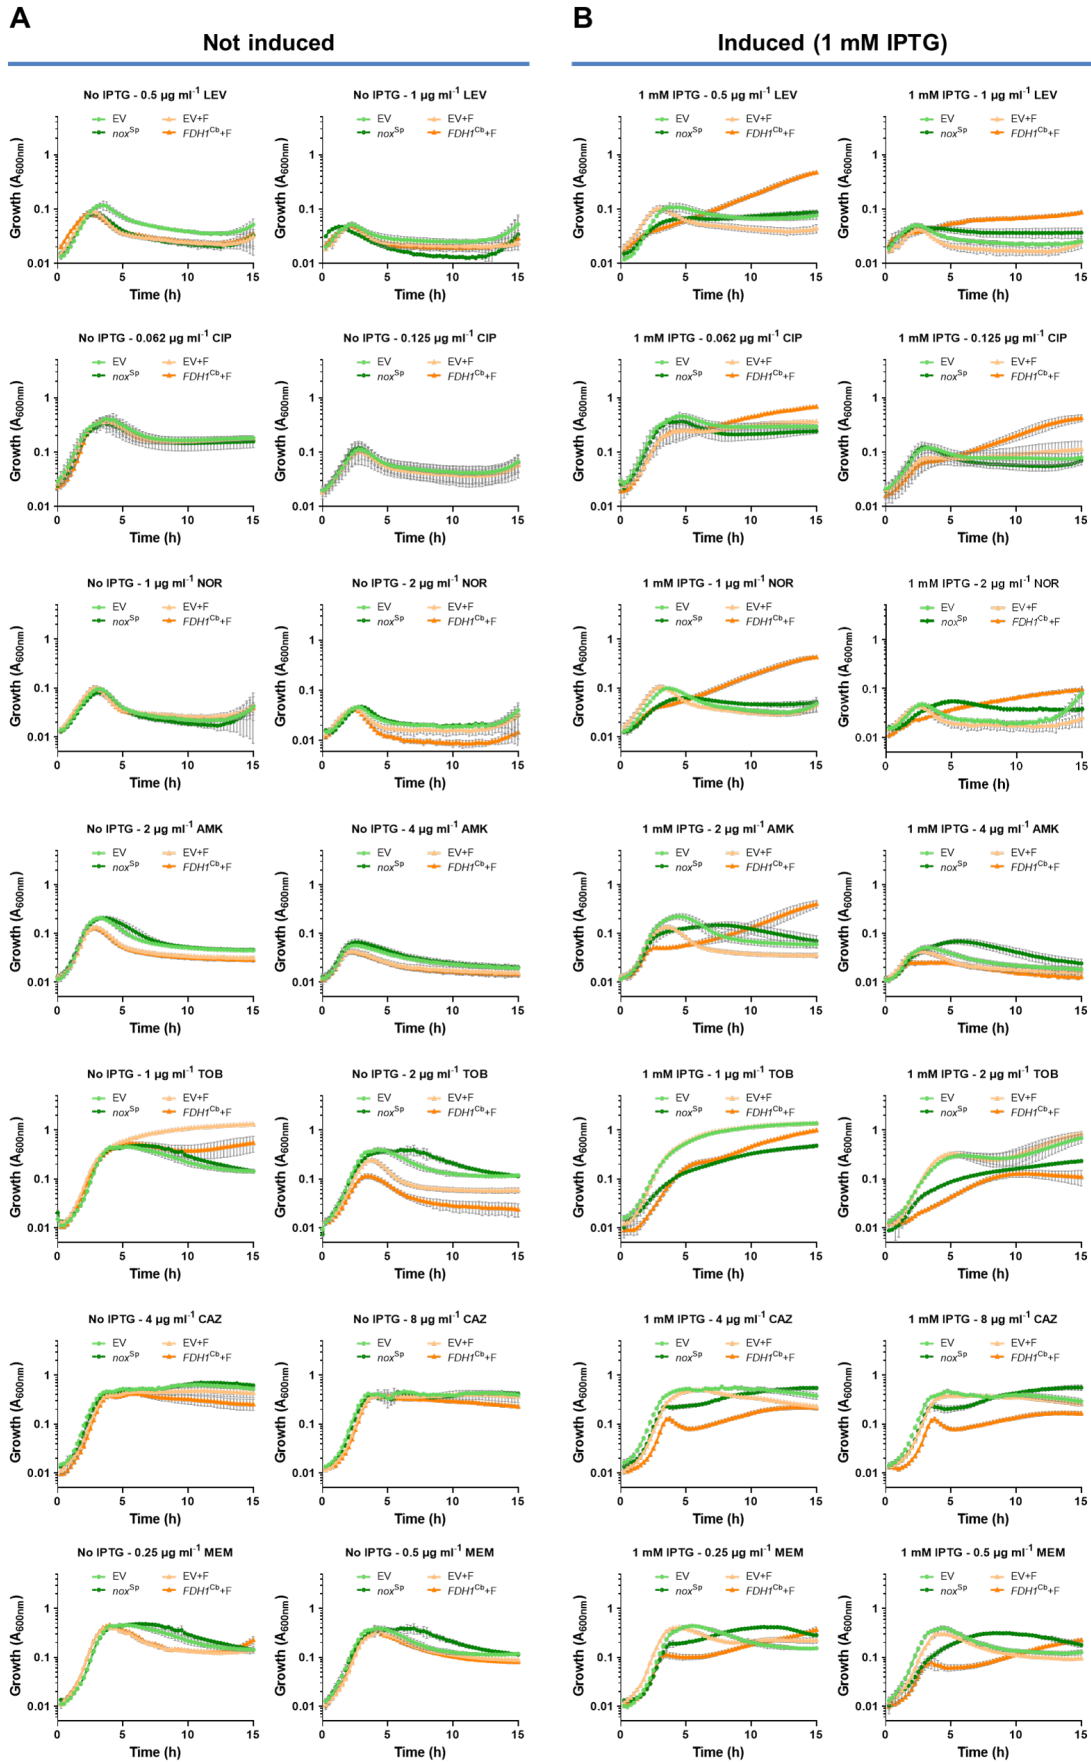

1 Fig. S3. Growth curves of *nox<sup>Sp</sup>*- and *FDH1<sup>Cb</sup>*-overexpressing *P. aeruginosa* PA14 challenged

2 **with different classes of antibiotics.** Bacteria carrying *nox*<sup>Sp</sup> or the *FDH1*<sup>Cb</sup> genes were grown in  
3 LB medium and the growth (absorbance at  $\lambda = 600$  nm) was recorded each 15 minutes. Cells  
4 carrying the empty vector (EV) served as a control and 10 mM sodium formate were  
5 supplemented to the cultures used for the *FDH1*<sup>Cb</sup> strain and the respective vector control. The  
6 cultures were started without (A) or with the addition of 1 mM IPTG (B), and supplemented with  
7 different concentration of antibiotics (specified in each case). The experiment was carried out  
8 in triplicates to ensure the reproducibility of the results. LEV: levofloxacin; CIP: ciprofloxacin;  
9 NOR: norfloxacin; AMK: amikacin; TOB: tobramycin; CAZ: ceftazidime; MEM: meropenem..
