# Supplementary material for: Dual Effect: High NADH Levels Contribute to Efflux-Mediated Antibiotic Resistance but Drive Lethality Mediated by Reactive Oxygen Species
Source: PubMed Central journal article supplement (PMC8764520; doi:10.1128/mbio.02434-21), 2022-01-18
Supplement: mbio.02434-21-sf004.pdf [file mbio.02434-21-sf004.pdf]

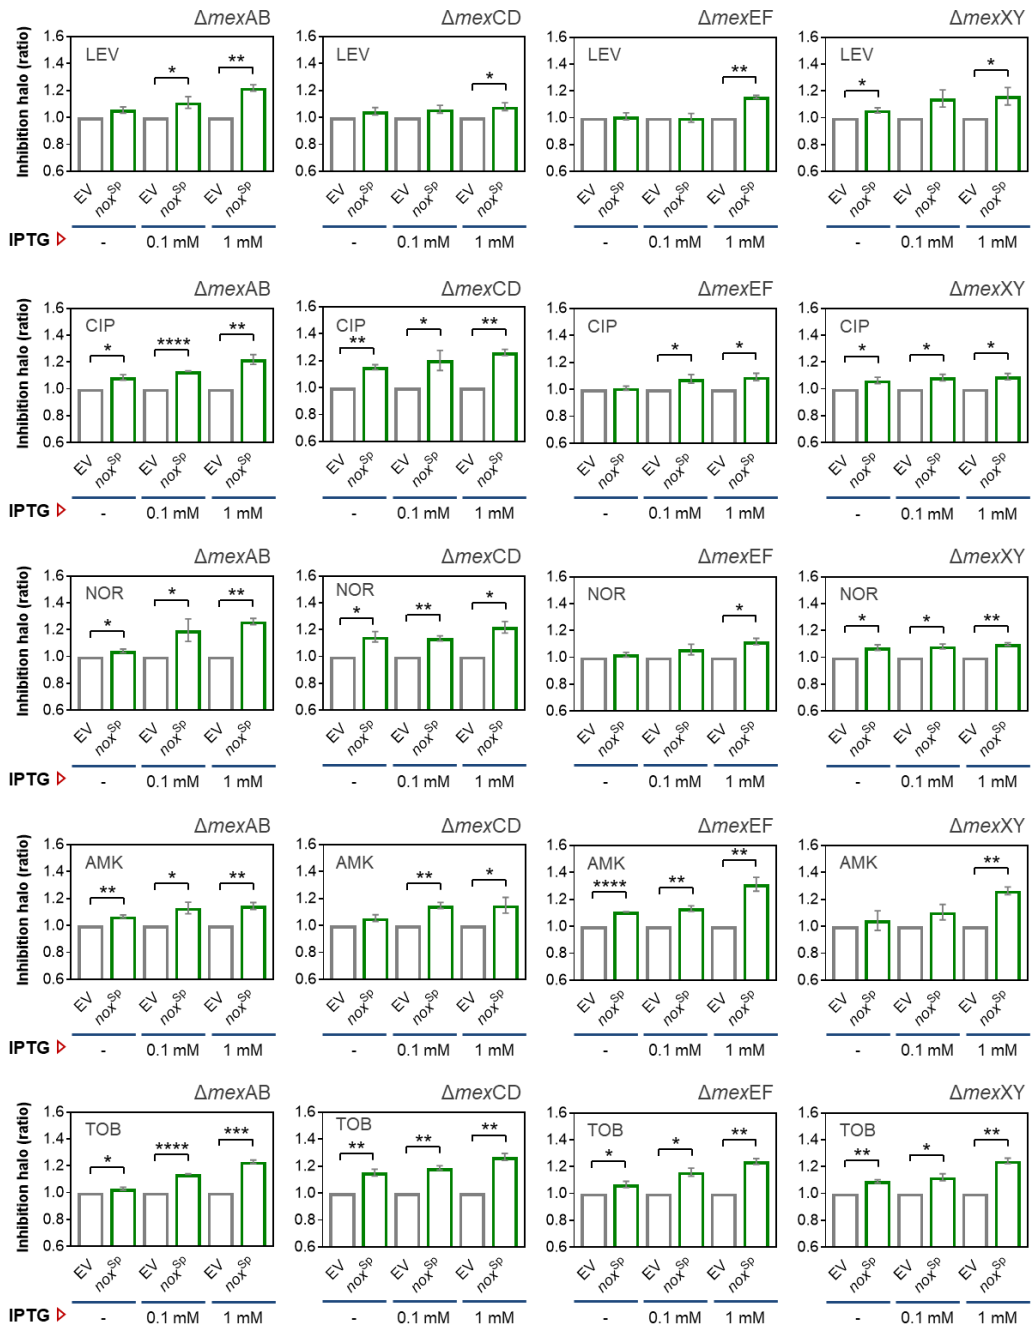

1 **Fig. S4. Antimicrobial disk diffusion assay in *P. aeruginosa* efflux pump mutants**  
2 **overexpressing *nox<sup>Sp</sup>*.** Deficient strains in the main RND efflux pumps ( $\Delta mexAB$ ,  $\Delta mexCD$ ,  
3  $\Delta mexEF$  and  $\Delta mexXY$ ) expressing *nox<sup>Sp</sup>* were plated onto LB-Agar with or without the inducer  
4 IPTG (0.1 mM or 1 mM, as indicated) and challenged with antibiotic-impregnated disks. Cells  
5 carrying the empty vector (EV) served as a control. The diameter of the inhibition zone of at least  
6 three independent experiments were measured and normalized to the empty vector. Significant  
7 differences between samples were calculated by means of a ratio paired t-test and are indicated  
8 by asterisks ( $p$ -value: \* < 0.05; \*\* < 0.01; \*\*\* < 0.001; \*\*\*\* < 0.0001). LEV: levofloxacin; CIP:  
9 ciprofloxacin; NOR: norfloxacin; AMK: amikacin; TOB: tobramycin.
