# Supplementary material for: Dual Effect: High NADH Levels Contribute to Efflux-Mediated Antibiotic Resistance but Drive Lethality Mediated by Reactive Oxygen Species
Source: PubMed Central journal article supplement (PMC8764520; doi:10.1128/mbio.02434-21), 2022-01-18
Supplement: mbio.02434-21-sf005.pdf [file mbio.02434-21-sf005.pdf]

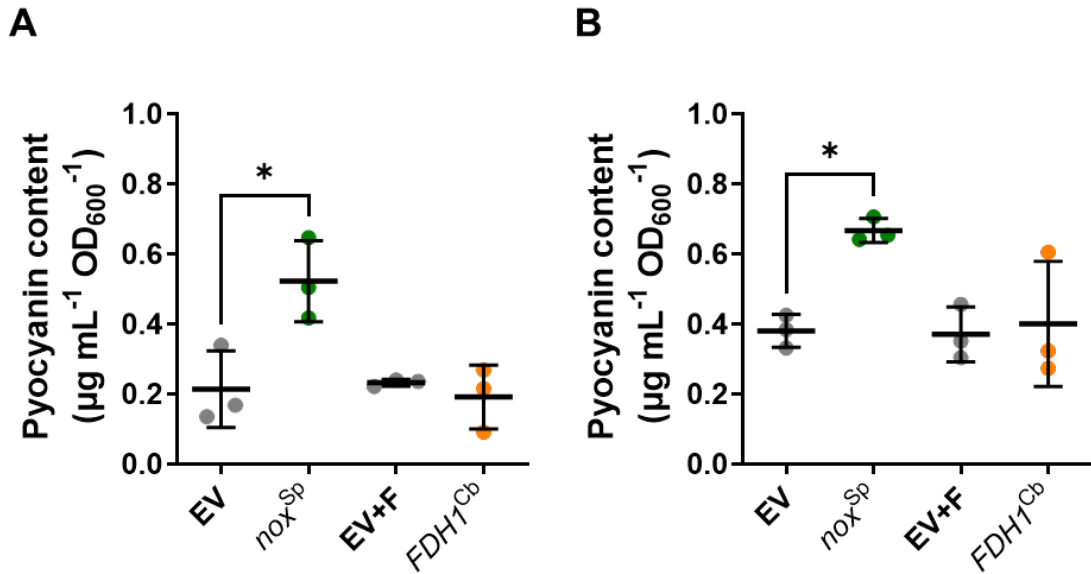

1 **Fig. S5. Pyocyanin content in *P. aeruginosa* overexpressing *nox*<sup>Sp</sup> and *FDH1*<sup>Cb</sup>.** Cells carrying the  
 2 empty vector (EV) served as a control. Induction of the cultures was achieved in early  
 3 exponential phase of growth by the addition of IPTG at 1mM. Samples were taken 2 h (A) and 3  
 4 h (B) post induction, pyocyanin was extracted in chloroform and quantified as detailed in the  
 5 experimental procedures. The pyocyanin concentration of at least three independent  
 6 experiments was calculated and reported as µg of the phenazine per ml relative to the OD<sub>600</sub> of  
 7 the culture. Significant differences between samples were calculated by the Mann-Whitney test  
 8 (\**p*-value < 0.05).
