# Supplementary material for: Dual Effect: High NADH Levels Contribute to Efflux-Mediated Antibiotic Resistance but Drive Lethality Mediated by Reactive Oxygen Species
Source: PubMed Central journal article supplement (PMC8764520; doi:10.1128/mbio.02434-21), 2022-01-18
Supplement: mbio.02434-21-sf006.pdf [file mbio.02434-21-sf006.pdf]

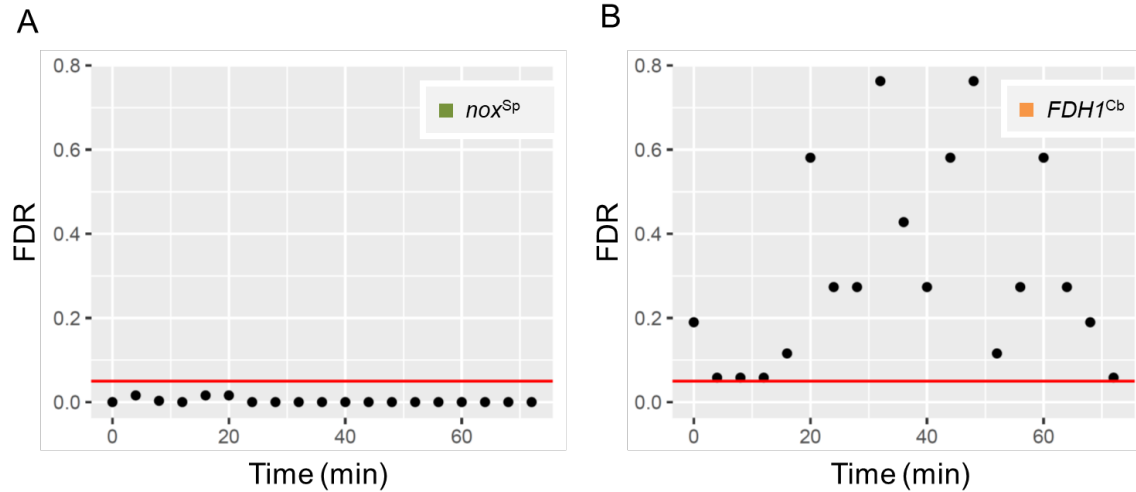

1 **Fig. S6. Statistical differences of intracellular pH values.** The differences between individual pH  
 2 values obtained for the *nox<sup>Sp</sup>* (A) or *FDH1<sup>Cb</sup>* (B) strains and their respective empty vector (EV)  
 3 controls were calculated using ranked data (separately for each experiment day) and a Welch's  
 4 two sample t-test. Multiple testing for the different time points was corrected using the false  
 5 discovery rate (FDR; check the main text for details). The final FDR calculated for each NAD<sup>+</sup>/H  
 6 manipulated strain vs EV is shown. The red line represents the limit FDR of 0.05. Calculations  
 7 were performed at least in 6 individual replicates.
