# Supplementary material for: Dual Effect: High NADH Levels Contribute to Efflux-Mediated Antibiotic Resistance but Drive Lethality Mediated by Reactive Oxygen Species
Source: PubMed Central journal article supplement (PMC8764520; doi:10.1128/mbio.02434-21), 2022-01-18
Supplement: mbio.02434-21-st001.pdf [file mbio.02434-21-st001.pdf]

1 **Table S1.** Bacterial strains and plasmids used in this study.

2

| Strain/plasmid                             | Description / relevant characteristics                                                                                                                                                                                             | Reference |
|--------------------------------------------|------------------------------------------------------------------------------------------------------------------------------------------------------------------------------------------------------------------------------------|-----------|
| <i>Strains</i>                             |                                                                                                                                                                                                                                    |           |
| <i>Escherichia coli</i> DH5 $\alpha$       | F <sup>-</sup> , <i>supE44</i> , $\Delta$ <i>lacU169</i> , ( $\phi$ 80 <i>lacZDM15</i> ), <i>hsdR17</i> , ( <i>rk</i> <sup>-</sup> <i>mk</i> <sup>+</sup> ), <i>recA1</i> , <i>endA1</i> , <i>thi1</i> , <i>gyrA</i> , <i>relA</i> | (1)       |
| <i>Pseudomonas aeruginosa</i> PA14         | Wild type strain                                                                                                                                                                                                                   | (2)       |
| <i>P. aeruginosa</i> $\Delta$ <i>mexAB</i> | PA14 strain with a complete deletion of <i>mexAB</i> genes                                                                                                                                                                         | (3)       |
| <i>P. aeruginosa</i> $\Delta$ <i>mexCD</i> | PA14 strain with a complete deletion of <i>mexCD</i> genes                                                                                                                                                                         | (3)       |
| <i>P. aeruginosa</i> $\Delta$ <i>mexEF</i> | PA14 strain with a complete deletion of <i>mexEF</i> genes                                                                                                                                                                         | (3)       |
| <i>P. aeruginosa</i> $\Delta$ <i>mexXY</i> | PA14 strain with a complete deletion of <i>mexXY</i> genes                                                                                                                                                                         | (3)       |
| <i>Plasmids</i>                            |                                                                                                                                                                                                                                    |           |
| pSEVA634                                   | Gm <sup>R</sup> , <i>oriV</i> pBBR1, <i>oriT</i> , <i>lacI</i> <sup>q</sup> / <i>P</i> <sub>trc</sub> expression cassette                                                                                                          | (4)       |
| pS234- <i>FDH1</i>                         | Km <sup>R</sup> , <i>oriV</i> pBBR1, <i>oriT</i> , <i>lacI</i> <sup>q</sup> / <i>P</i> <sub>trc</sub> controlling the expression of <i>FDH1</i> <sup>Cb</sup>                                                                      | (5)       |
| pS234- <i>nox</i>                          | Km <sup>R</sup> , <i>oriV</i> pBBR1, <i>oriT</i> , <i>lacI</i> <sup>q</sup> / <i>P</i> <sub>trc</sub> controlling the expression of <i>nox</i> <sup>Sp</sup>                                                                       | (6)       |
| pAAHFDH1                                   | Gm <sup>R</sup> , pSEVA634 expressing the <i>FDH1</i> <sup>Cb</sup> under the control of <i>lacI</i> <sup>q</sup> / <i>P</i> <sub>trc</sub>                                                                                        | This Work |
| pAAHnox1                                   | Gm <sup>R</sup> , pSEVA634 expressing the <i>nox</i> <sup>Sp</sup> under the control of <i>lacI</i> <sup>q</sup> / <i>P</i> <sub>trc</sub>                                                                                         | This Work |
| pSEVA247R                                  | Km <sup>R</sup> , <i>oriV</i> pRO1600/ <i>ColE1</i> , <i>oriT</i> , promoterless vector including <i>mcherry</i> as a reporter gene                                                                                                | (4)       |
| pAAHPoxyR2                                 | Km <sup>R</sup> , pSEVA247R cloned with the <i>oxyR</i> promoter. Used as a oxidative stress sensor                                                                                                                                | This Work |
| pS2513- <i>PHP</i>                         | Km <sup>R</sup> , <i>oriV</i> RSF1010, <i>oriT</i> , <i>P</i> <sub>EM7</sub> $\rightarrow$ <i>PHP</i> . Used for the quantification of intracellular pH                                                                            | (7)       |

3

4

5

6   **REFERENCES**

- 7   1.     Hanahan D, Meselson M. 1983. Plasmid screening at high colony density. *Methods*  
8         *Enzymol* 100:333-42.
- 9   2.     Friedman L, Kolter R. 2004. Genes involved in matrix formation in *Pseudomonas*  
10        *aeruginosa* PA14 biofilms. *Mol Microbiol* 51:675-90.
- 11  3.     Seupt A, Schniederjans M, Tomasch J, Haussler S. 2020. Expression of the MexXY  
12         Aminoglycoside Efflux Pump and Presence of an Aminoglycoside-Modifying Enzyme in  
13         Clinical *Pseudomonas aeruginosa* Isolates Are Highly Correlated. *Antimicrob Agents*  
14         *Chemother* 65.
- 15  4.     Silva-Rocha R, Martinez-Garcia E, Calles B, Chavarria M, Arce-Rodriguez A, de Las Heras  
16         A, Paez-Espino AD, Durante-Rodriguez G, Kim J, Nickel PI, Platero R, de Lorenzo V. 2013.  
17         The Standard European Vector Architecture (SEVA): a coherent platform for the analysis  
18         and deployment of complex prokaryotic phenotypes. *Nucleic Acids Res* 41:D666-75.
- 19  5.     Akkaya O, Perez-Pantoja DR, Calles B, Nickel PI, de Lorenzo V. 2018. The Metabolic Redox  
20         Regime of *Pseudomonas putida* Tunes Its Evolvability toward Novel Xenobiotic  
21         Substrates. *mBio* 9.
- 22  6.     Nickel PI, Perez-Pantoja D, de Lorenzo V. 2016. Pyridine nucleotide transhydrogenases  
23         enable redox balance of *Pseudomonas putida* during biodegradation of aromatic  
24         compounds. *Environ Microbiol* 18:3565-3582.
- 25  7.     Arce-Rodriguez A, Volke DC, Bense S, Haussler S, Nickel PI. 2019. Non-invasive,  
26         ratiometric determination of intracellular pH in *Pseudomonas species* using a novel  
27         genetically encoded indicator. *Microb Biotechnol* 12:799-813.

28
